# Supplementary material
Source: HighWire-hosted journal article supplement (https://openheart.bmj.com/content/6/1/e000987)
Supplement: inline-supplementary-material-1 [file inline-supplementary-material-1.pdf]

# **Impella versus IABP in acute myocardial infarction complicated by cardiogenic shock**

## **SUPPLEMENTARY MATERIAL**

### **Table of Contents**

|                                                                                          |   |
|------------------------------------------------------------------------------------------|---|
| SUPPLEMENTARY MATERIAL .....                                                             | 1 |
| Supplementary table 1. Cardiac rhythm at presentation.....                               | 2 |
| Supplementary figure 1. Patient selection flowchart.....                                 | 3 |
| Supplementary figure 2. Change in cardiac power within five days of ICU stay .....       | 4 |
| Supplementary figure 3. All-cause mortality and specific causes of death at 30 days..... | 5 |

**Supplementary table 1. Cardiac rhythm at presentation**

|                               | <b>Total</b> | <b>IABP</b> | <b>IMPELLA</b> | <b>P-value</b> |
|-------------------------------|--------------|-------------|----------------|----------------|
|                               | <b>N=116</b> | <b>N=54</b> | <b>N=62</b>    |                |
| Sinus rhythm                  | 57 (50)      | 31 (59)     | 26 (42)        | 0.13           |
| Ventricular fibrillation      | 25 (22)      | 8 (15)      | 17 (27)        | 0.12           |
| Supraventricular arrhythmia   | 13 (11)      | 7 (13)      | 6 (9.7)        | 0.57           |
| Pulseless electrical activity | 9 (7.8)      | 4 (7.6)     | 8 (8.0)        | 0.38           |
| Ventricular tachycardia       | 4 (3.5)      | 0 (0)       | 4 (6.5)        | 0.12           |
| Bradycardia                   | 4 (3.5)      | 2 (3.7)     | 2 (3.2)        | 1.00           |
| Pacemaker rhythm              | 2 (1.7)      | 0 (0)       | 2 (3.2)        | 0.45           |
| Asystole                      | 1 (0.9)      | 0 (0)       | 1 (1.9)        | 1.00           |

Data depicted as median [IQR] or counts (%). P values are from Wilcoxon rank sum or Fischer's test.

**Supplementary figure 1. Patient selection flowchart**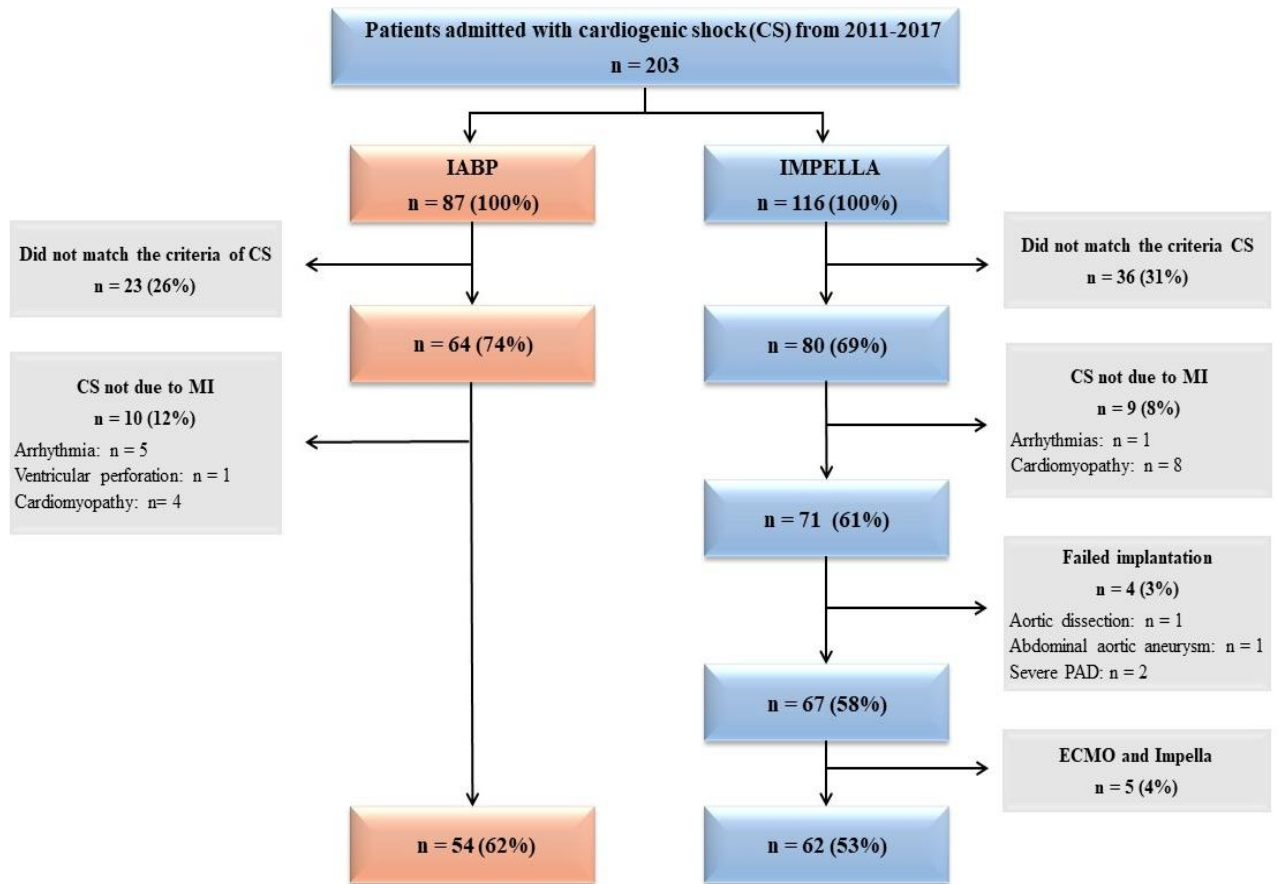

Flowchart depicting the selection process of patients with cardiogenic shock due to AMI receiving MCS. AMI-acute myocardial infarction; CS-cardiogenic shock; ECMO-extracorporeal membrane oxygenation; MCS-mechanical circulatory support; MI-myocardial infarction.

**Supplementary figure 2. Change in cardiac power within five days of ICU stay**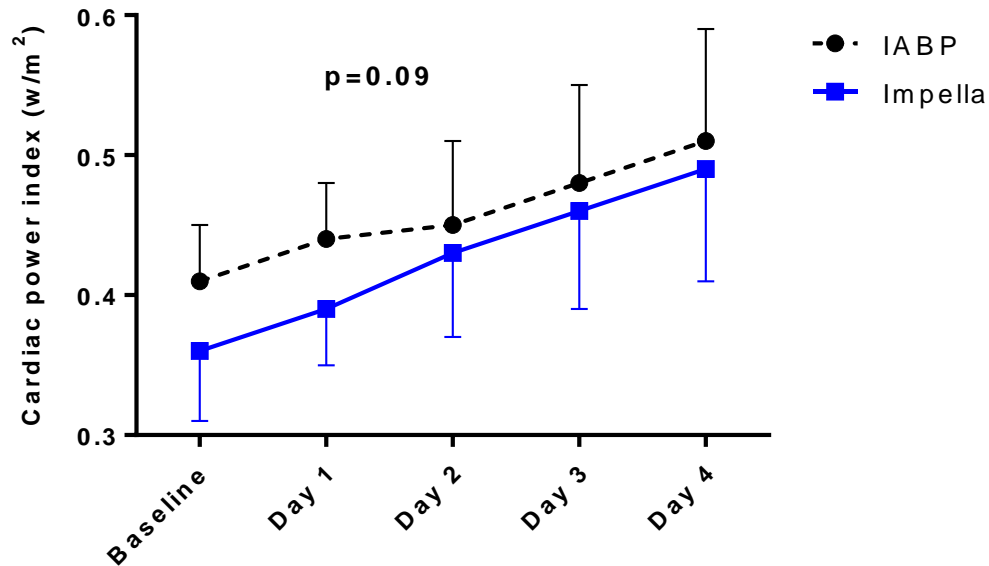

Measurements are presented as median and 25<sup>th</sup> to 75<sup>th</sup> percentile. P values are from a generalized linear model considering the between and within difference among groups. CPI: cardiac power index; Cardiac power index ( $w/m^2$ ), calculated as:  $CI * \text{mean arterial pressure (MAP)} * 0.0022$ .

**Supplementary figure 3. All-cause mortality and specific causes of death at 30 days**

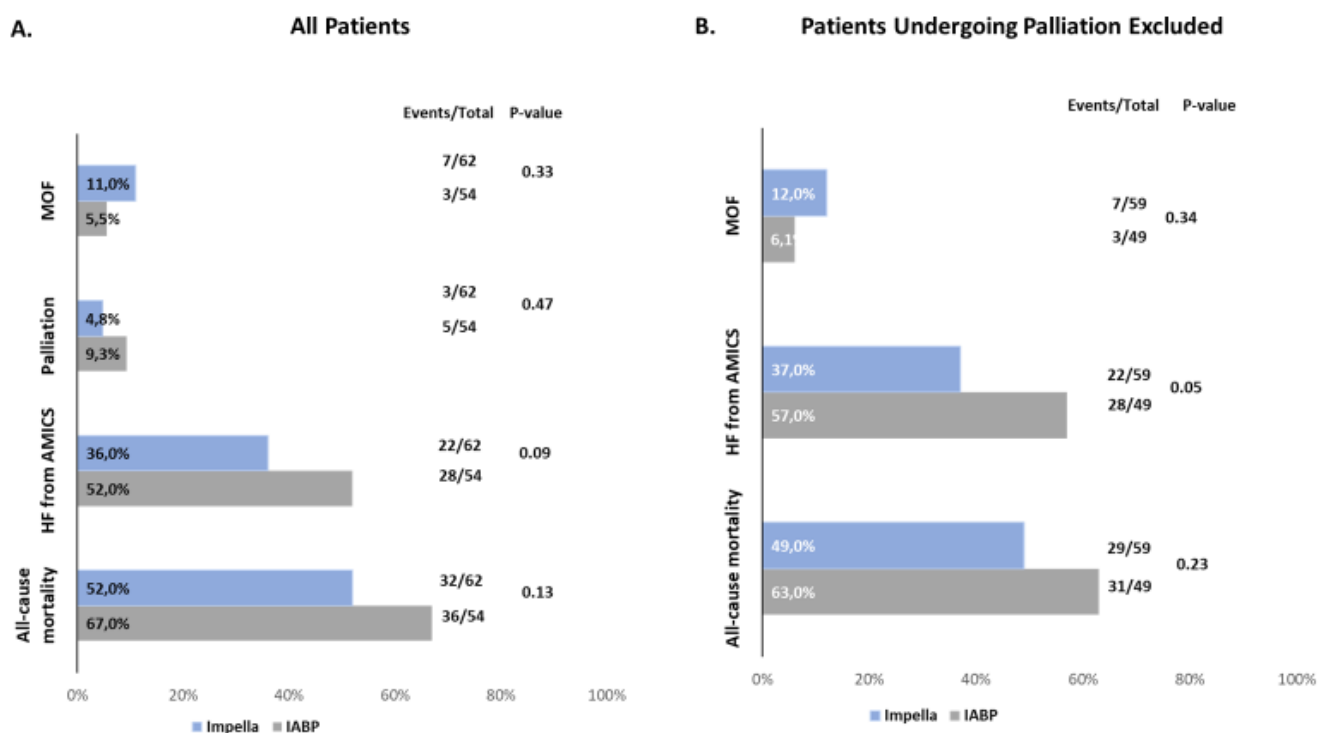

Depicted are counts and frequencies. P values are from log rank test. A) Mortality rates in the whole study population B) Mortality rates after excluding deaths from to palliation due to irreversible post-anoxic brain damage. Heart failure due to AMICS-heart failure due to Acute Myocardial Infarction related Cardiogenic Shock, MOF-multiorgan failure.
